# Supplementary material for: Estimating the Prevalence of Knee Pain and the Association between Illness Perception Profiles and Self-Management Strategies in the Frederiksberg Cohort of Elderly Individuals with Knee Pain: A Cross-Sectional Study
Source: MDPI journal article supplement (doi:10.3390/jcm10040668), 2021-02-09
Supplement: s1 [file s1]

# Predefined choices concerning use of complementary and alternative medicine

---

Do you take any of the following vitamins or minerals, daily or almost daily SPECIFICALLY for your knee pain/discomfort?

(Please tick the appropriate boxes )

- ☐ no, I do not take vitamins or minerals daily or almost daily for my knee pain/discomfort
- ☐ vitamin A
- ☐ vitamin B1
- ☐ vitamin B12
- ☐ vitamin C
- ☐ vitamin D
- ☐ vitamin D with calcium
- ☐ vitamin E
- ☐ calcium
- ☐ vitamin K
- ☐ multivitamin
- ☐ zinc
- ☐ iron
- ☐ chromium
- ☐ selenium
- ☐ magnesium
- ☐ potassium
- ☐ iodine
- ☐ other

Do you take any of the following dietary supplements or herbal medicines daily or almost daily SPECIFICALLY for your knee pain/discomfort?

(Please tick the appropriate boxes )

- ☐ no, I do not take dietary supplements/herbal medicines daily or almost daily for my knee pain/discomfort
- ☐ rosehip
- ☐ ginger
- ☐ ginkgo biloba
- ☐ fish oil/cod liver oil
- ☐ garlic
- ☐ buckthorn
- ☐ yeast
- ☐ turmeric
- ☐ aloe vera
- ☐ avocado soybean
- ☐ seaweed
- ☐ flaxseed oil
- ☐ echinacea
- ☐ revadol
- ☐ ginseng
- ☐ glucosamine
- ☐ medical cannabinoids
- ☐ litomove
- ☐ vitae pro
- ☐ zincuflex
- ☐ longovital
- ☐ chlorella
- ☐ probiotic
- ☐ scanalka
- ☐ chondroitin
- ☐ other

---

Have you, within the last year, received any of the following non-medical treatments, SPECIFICALLY for your knee pain/discomfort?  
(Please tick the appropriate boxes )

- ☐ no, I have not received any non-medical treatments for my knee pain/discomfort
- ☐ acupuncture
- ☐ hormone therapy
- ☐ acupressure
- ☐ hypnosis
- ☐ massage
- ☐ body-sds
- ☐ psychotherapeutic treatments
- ☐ healing
- ☐ reflexology
- ☐ homeopathy
- ☐ numerology
- ☐ biopathy/naturopathi
- ☐ cranio sacral therapy
- ☐ kinesiology
- ☐ iridology
- ☐ herbal therapy/phytotherapy
- ☐ other
